# Supplementary material
Source: publisher figshare collection journal article supplement (https://tandf.figshare.com/ndownloader/files/30921859)
Supplement: Supplementary file 1 [file 30921859]

Supplementary Data

The weight of feces (gram) of subjects

| Weeks                | Placebo                   | PEC I                       | PEC II                      |
|----------------------|---------------------------|-----------------------------|-----------------------------|
| Initial              | 115.49±39.62 <sup>a</sup> | 111.08±52.99 <sup>a</sup>   | 101.84±37.93 <sup>a</sup>   |
| 2 <sup>nd</sup> week | 117.20±38.96 <sup>a</sup> | 171.93±76.31 <sup>b</sup>   | 167.00±45.79 <sup>b</sup>   |
| 4 <sup>th</sup> week | 117.68±61.56 <sup>a</sup> | 173.99±92.77 <sup>b**</sup> | 220.83±76.17 <sup>c**</sup> |
| 6 <sup>th</sup> week | 116.60±45.23 <sup>a</sup> | 130.81±57.29 <sup>ab</sup>  | 138.47±53.72 <sup>ab</sup>  |

Data are expressed as mean ± SD. Data within the same column bearing different superscript letters were significantly different ( $P < 0.05$ ). \*  $P < 0.05$ , \*\*  $P < 0.01$  (Placebo vs PEC I and II in 4<sup>th</sup> week).

The time (min) for passing through intestine/ Bowel transit time

| Weeks                | Placebo                   | PEC I                     | PEC II                    |
|----------------------|---------------------------|---------------------------|---------------------------|
| Initial              | 117.80±48.83 <sup>a</sup> | 118.15±29.06 <sup>a</sup> | 118.25±27.98 <sup>a</sup> |
| 4 <sup>th</sup> week | 115.70±51.72 <sup>a</sup> | 91.80±26.26 <sup>b</sup>  | 81.35±19.78 <sup>b</sup>  |
| 6 <sup>th</sup> week | 116.45±24.67 <sup>a</sup> | 98.56±15.35 <sup>b</sup>  | 87.13±14.45 <sup>b</sup>  |

Data are expressed as mean ± SD. Data within the same column bearing different superscript letters were significantly different ( $P < 0.05$ ). \*  $P < 0.05$ , \*\*  $P < 0.01$  (Placebo vs PEC I and II in 4<sup>th</sup> week).
